# Supplementary material for: Preparation of polyaspartamide-based adhesive hydrogels via Schiff base reaction with aldehyde-functionalized dextran
Source: Royal Society of Chemistry journal article supplement (doi:10.1039/d3ma00032j), 2023-01-01
Supplement: d3ma00032j1.pdf [file d3ma00032j1.pdf]

Electronic Supplementary Information

## **Preparation of Polyaspartamide-based Adhesive Hydrogels via Schiff Base Reaction with Aldehyde-functionalized Dextran.**

*Hend A. Hegazy*<sup>†a,c</sup>, *Hwi Hyun Moon*<sup>†a</sup>, *Dong-Hyun Lee*<sup>b</sup>, *Suk Ho Bhang*<sup>b</sup>, *Youn-Chul Kim*<sup>\*b</sup>,  
*Changsik Song*<sup>\*a</sup>, and *Ji-Heung Kim*<sup>\*b</sup>

<sup>a</sup>Department of Chemistry, Sungkyunkwan University, Suwon, Gyeonggi 16419, Republic of Korea.

<sup>b</sup>Department of Chemical Engineering, Sungkyunkwan University, Suwon, Gyeonggi 16419, Republic of Korea.

<sup>c</sup>Department of Chemistry, Faculty of Science, Zagazig University, Zagazig, Egypt.

Email: [younckim@skku.edu](mailto:younckim@skku.edu) (YC); [songcs@skku.edu](mailto:songcs@skku.edu) (CS); [kimjh@skku.edu](mailto:kimjh@skku.edu) (JH).

## Table of Contents

|                                                    |                                                                                                                                                                                                                                                                                                                                                                                                     |    |
|----------------------------------------------------|-----------------------------------------------------------------------------------------------------------------------------------------------------------------------------------------------------------------------------------------------------------------------------------------------------------------------------------------------------------------------------------------------------|----|
| <b>1. NMR spectra of the synthesized compounds</b> |                                                                                                                                                                                                                                                                                                                                                                                                     |    |
| Figure S1.                                         | <sup>1</sup> H NMR spectrum of <b>PSI</b> and <b>PHyAm</b> polymers (500 MHz, D <sub>2</sub> O).                                                                                                                                                                                                                                                                                                    | S3 |
| Figure S2.                                         | <sup>1</sup> H NMR spectrum of <b>dextran</b> and <b>Odex</b> polymers (500 MHz, D <sub>2</sub> O).                                                                                                                                                                                                                                                                                                 | S4 |
| <b>2. Supplementary Figures</b>                    |                                                                                                                                                                                                                                                                                                                                                                                                     |    |
| Figure S3.                                         | FT-IR data of <b>Odex</b> , <b>PHyAm</b> , and Hydrogel polymers.                                                                                                                                                                                                                                                                                                                                   | S5 |
| Figure S4.                                         | Oscillation time scan test of gelation time.                                                                                                                                                                                                                                                                                                                                                        | S6 |
| Figure S5.                                         | (a) Frequency dependence of the storage (G') and loss (G'') modulus of P <sub>1</sub> O <sub>0.5</sub> hydrogel, (b) Storage (G') and loss (G'') modulus of P <sub>1</sub> O <sub>1</sub> , (c) Storage (G') and loss (G'') modulus of P <sub>1</sub> O <sub>1.5</sub> at concentrations of 20, 30, and 40 wt%. (d) Damping factor data of hydrogel at different concentrations 20, 30, and 40 wt%. | S7 |
| Figure S6.                                         | (a) SEM images of the P <sub>1</sub> O <sub>1.5</sub> hydrogels formed at concentrations of 20, 30, and 40 wt%. (b) Average pore diameter of P <sub>1</sub> O <sub>1.5</sub> hydrogel at concentrations of 20, 30, and 40 wt%.                                                                                                                                                                      | S8 |
| Figure S7.                                         | (a) Adhesion strength of hydrogel using 20 wt% P <sub>1</sub> O <sub>1</sub> at different time on glass substrate. (b) Adhesion strength of hydrogel of different ratios after 10 min, (c) Adhesion strength of different ratios and concentrations after 12 h on glass substrate. (d) Wet and dry adhesion strength of hydrogel on porcine skin.                                                   | S9 |

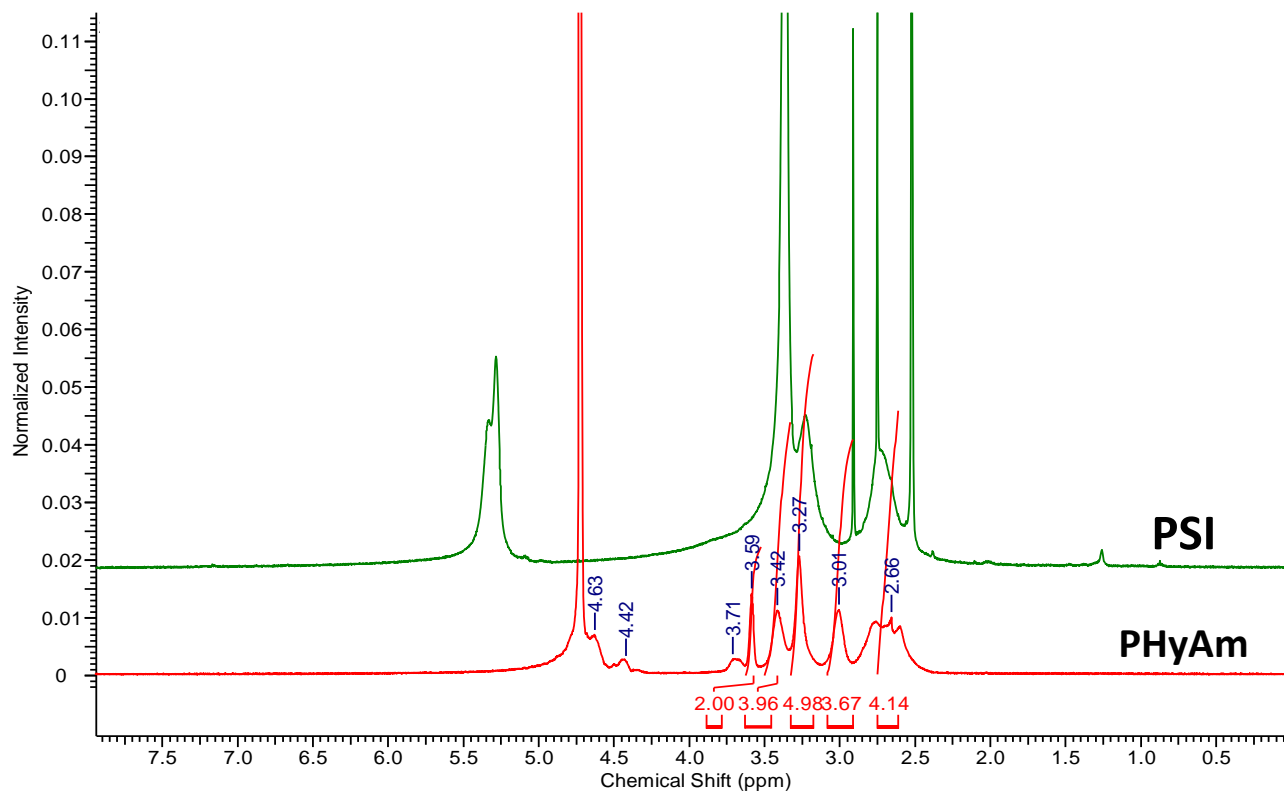

**Figure S1.** <sup>1</sup>H NMR spectrum of **PSI** and **PHyAm** polymers (500 MHz, D<sub>2</sub>O).

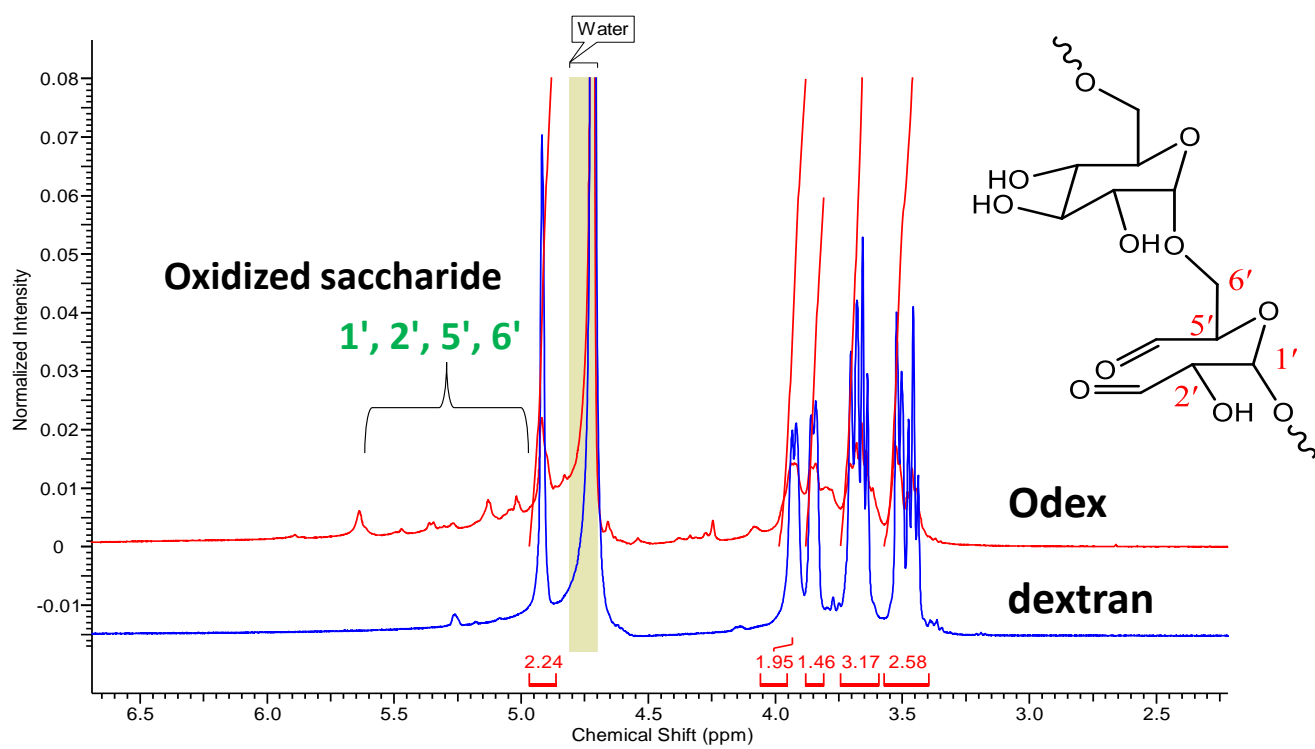

**Figure S2.**  $^1\text{H}$  NMR spectrum of **dextran** and **Odex** polymers (500 MHz,  $\text{D}_2\text{O}$ ).

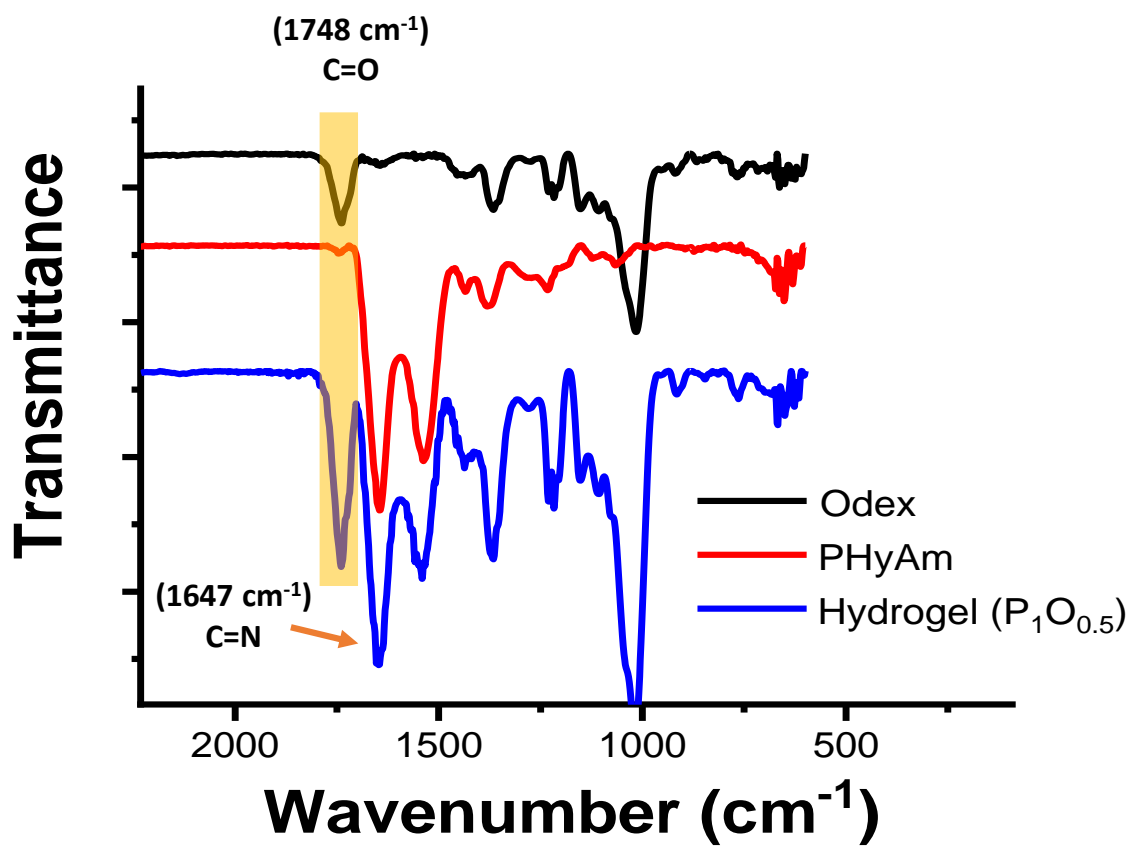

Figure S3. FT-IR data of Odex, PHyAm, and Hydrogel polymers.

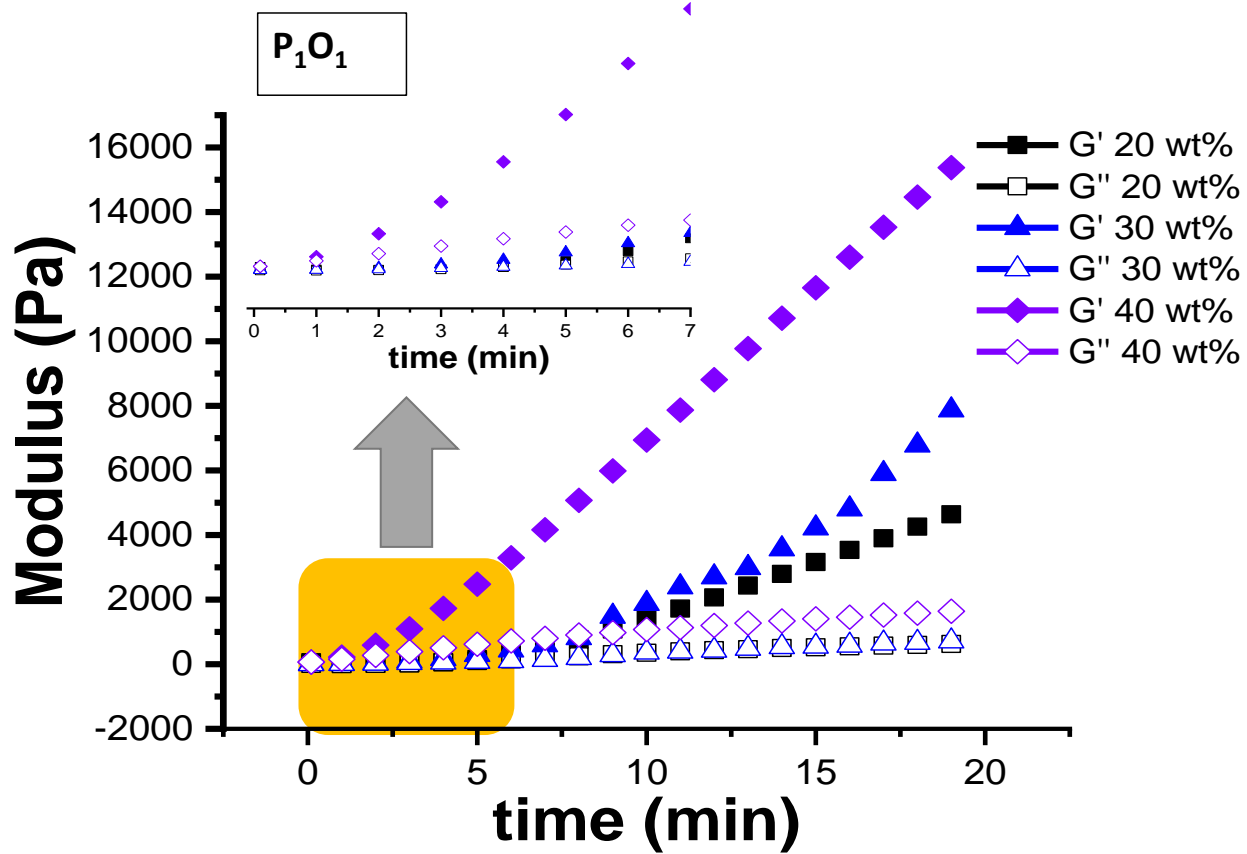

Figure S4. Oscillation time scan test of gelation time.

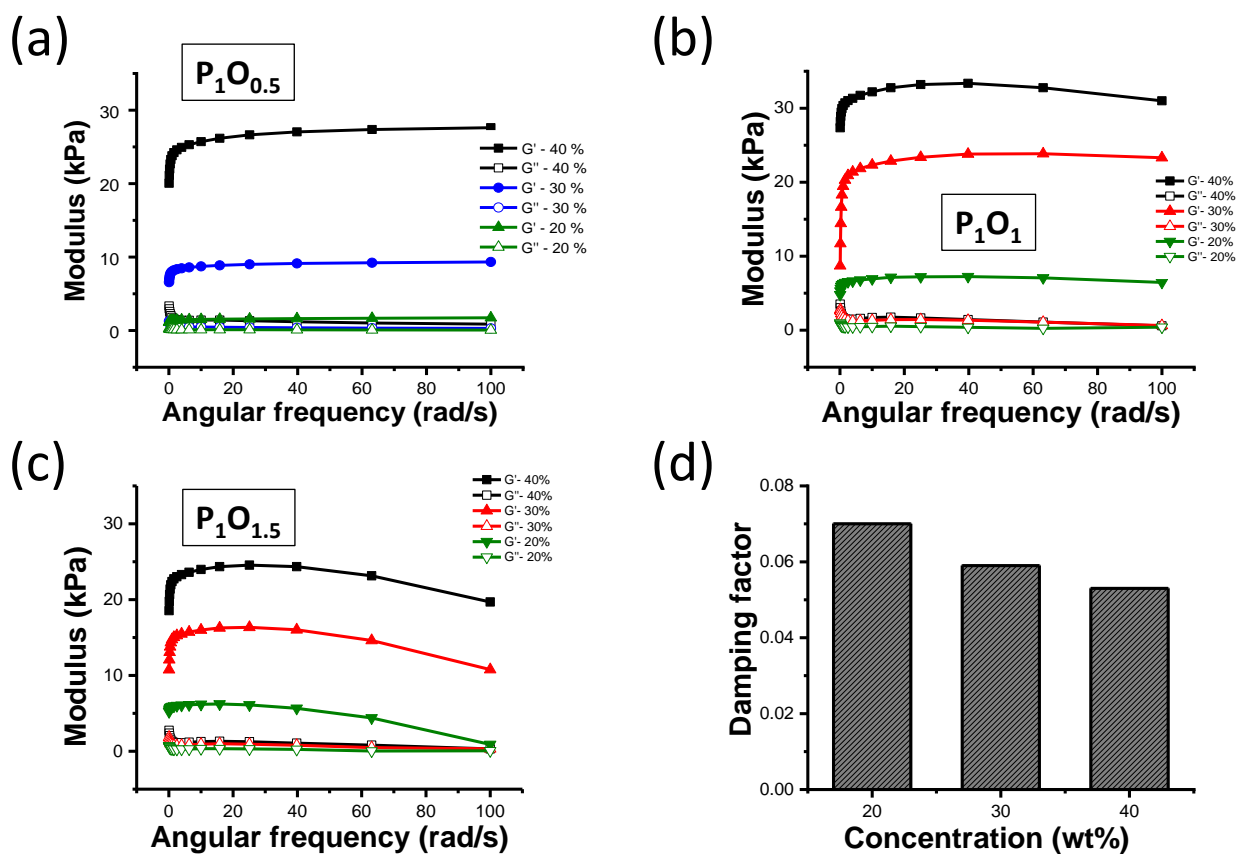

**Figure S5.** (a) Frequency dependence of the storage ( $G'$ ) and loss ( $G''$ ) modulus of  $P_1O_{0.5}$  hydrogel, (b) Storage ( $G'$ ) and loss ( $G''$ ) modulus of  $P_1O_1$ , (c) Storage ( $G'$ ) and loss ( $G''$ ) modulus of  $P_1O_{1.5}$  at concentrations of 20, 30, and 40 wt%. (d) Damping factor data of hydrogel at different concentrations 20, 30, and 40 wt%.

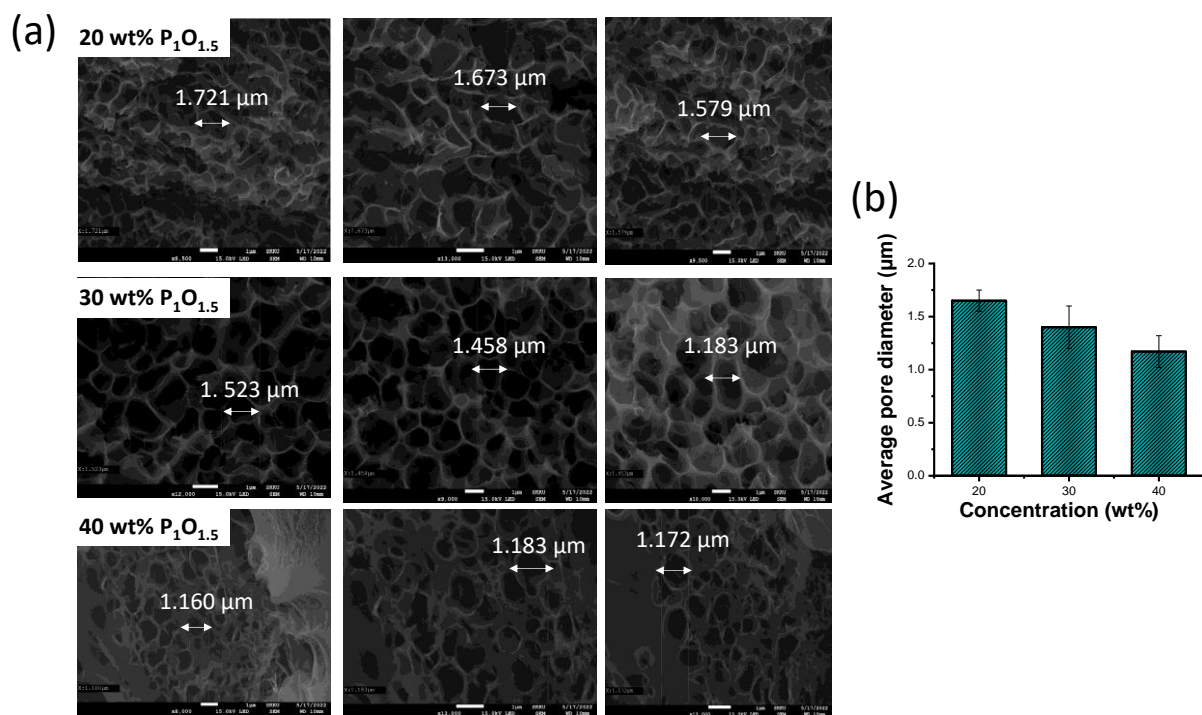

**Figure S6.** (a) SEM images of the  $P_1O_{1.5}$  hydrogels formed at concentrations of 20, 30, and 40 wt%, the scale is 1  $\mu\text{m}$ . (b) Average pore diameter of  $P_1O_{1.5}$  hydrogel at concentrations of 20, 30, and 40 wt%.



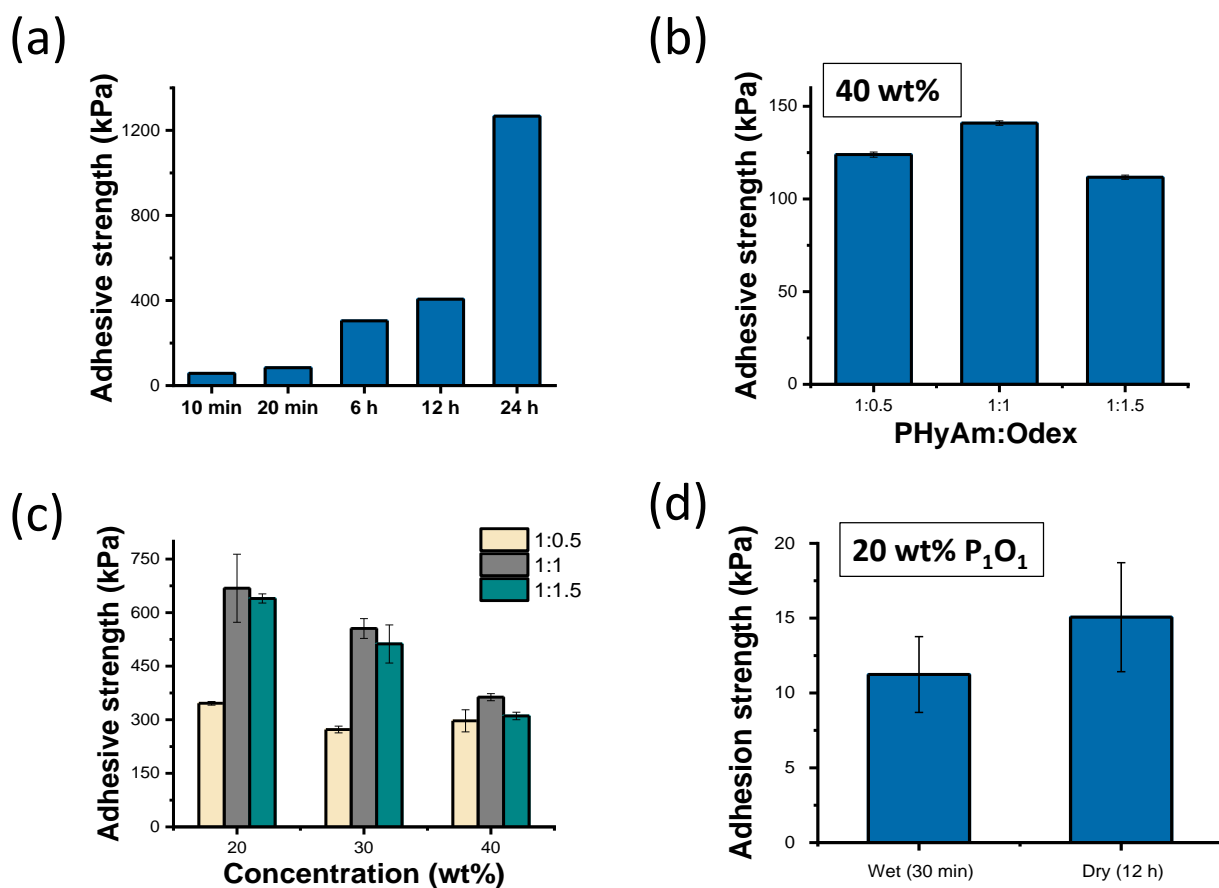

**Figure S7.** (a) Adhesion strength of hydrogel using 20 wt%  $P_1O_1$  at different time on glass substrate. (b) Adhesion strength of hydrogel of different ratios after 10 min, (c) Adhesion strength of different ratios and concentrations after 12 h on glass substrate. (d) Wet and dry adhesion strength of hydrogel on porcine skin.
